# Supplementary material for: Identification of Plastics in Mixtures and Blends through Pyrolysis-Gas Chromatography/Mass Spectrometry
Source: MDPI journal article supplement (doi:10.3390/polym16010071), 2023-12-26
Supplement: s1 [file s1]

## Supplementary information

Figure S1, Figure S2, Figure S3, Figure S4 and Figure S5 show the chromatograms of each polymer.

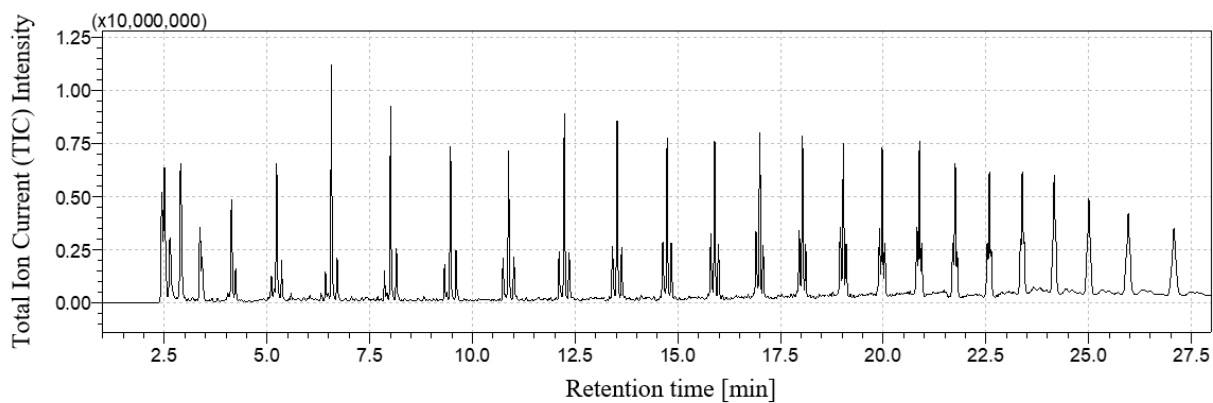

**Figure S1.** LDPE chromatogram.

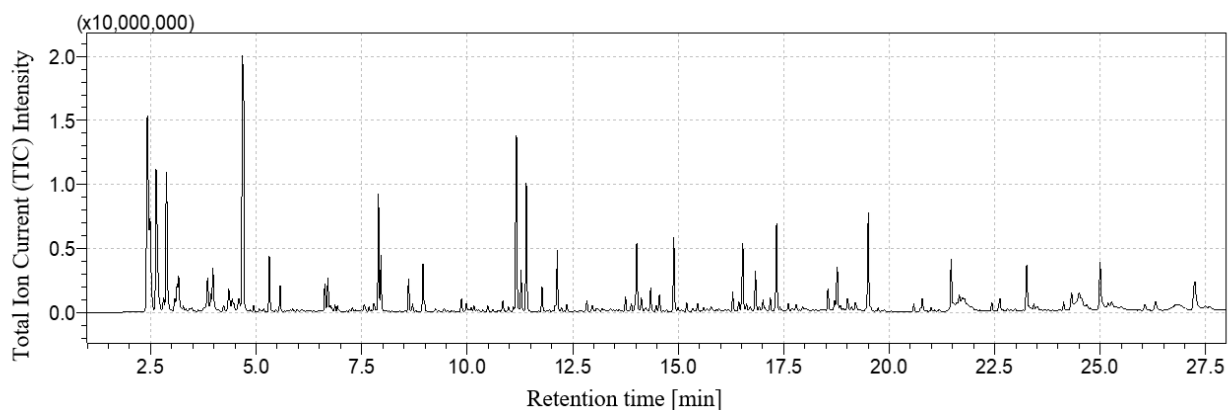

**Figure S2.** PP chromatogram.

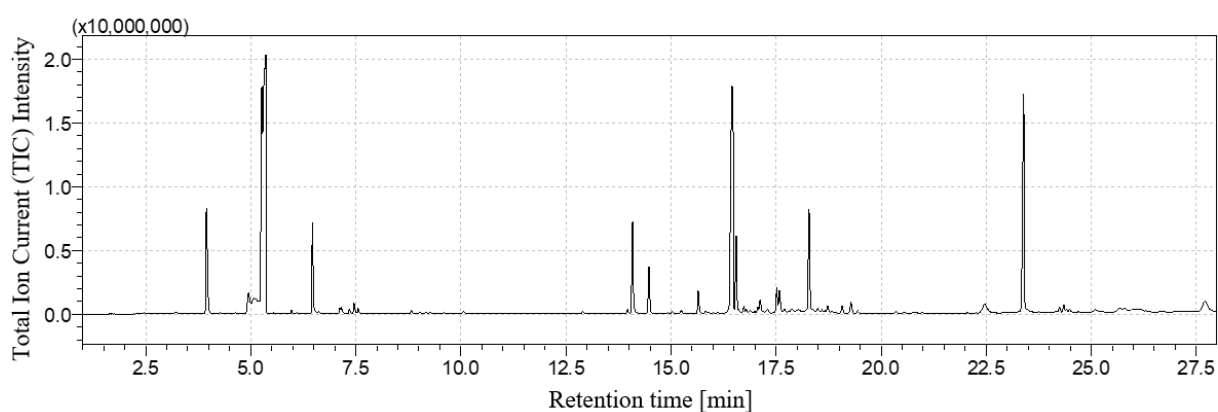

**Figure S3.** PS chromatogram.

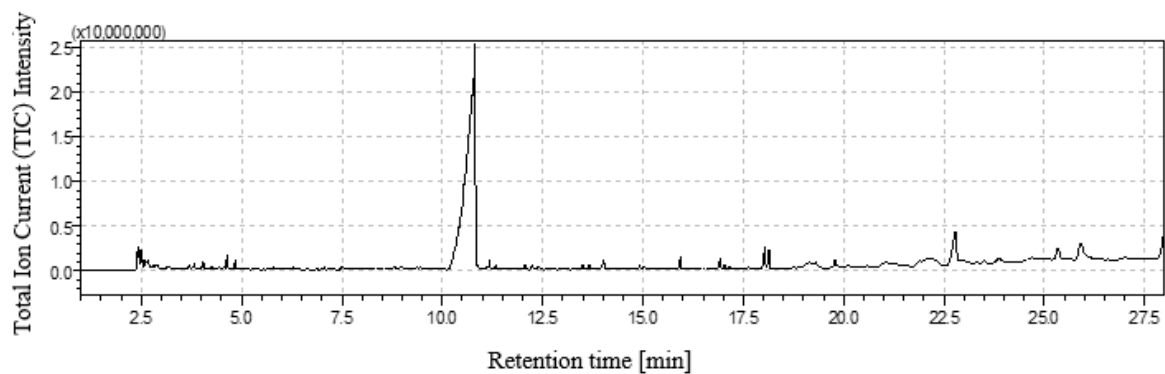

**Figure S4.** PA chromatogram.

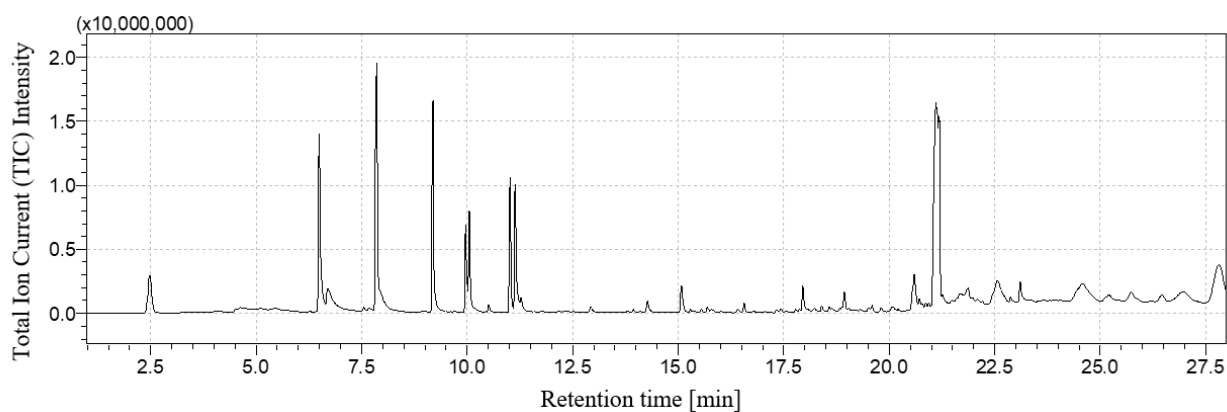

**Figure S5.** PC chromatogram.

Figure S6 and Figure S7 show LDPE+PS chromatogram and its comparison with LDPE and PS chromatograms.

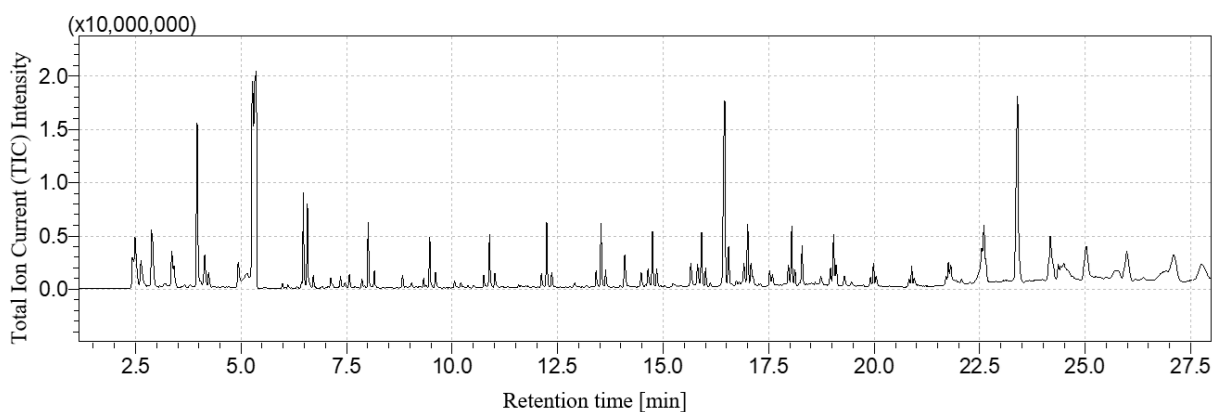

**Figure S6.** LDPE+PS chromatogram.

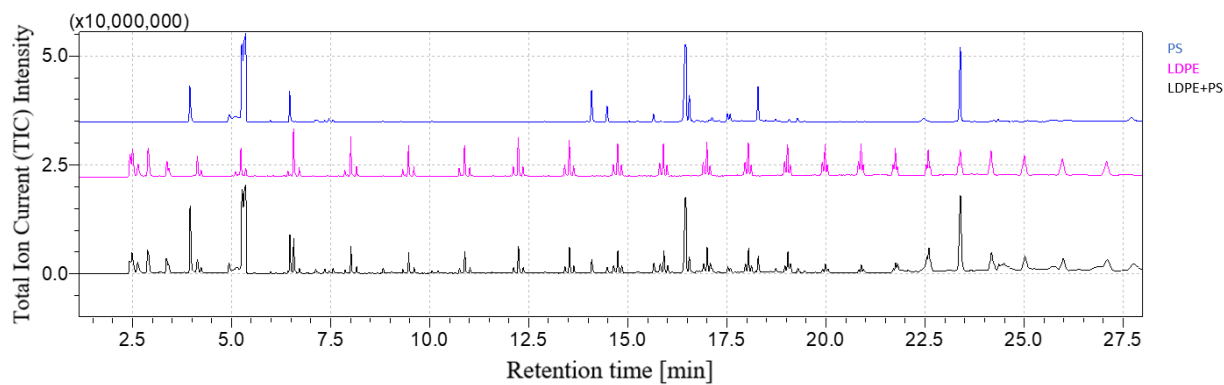

**Figure S7.** LDPE+PS chromatogram comparison.

Figure S8 and Figure S9 show PP+PS chromatogram and its comparison with PP and PS chromatograms.

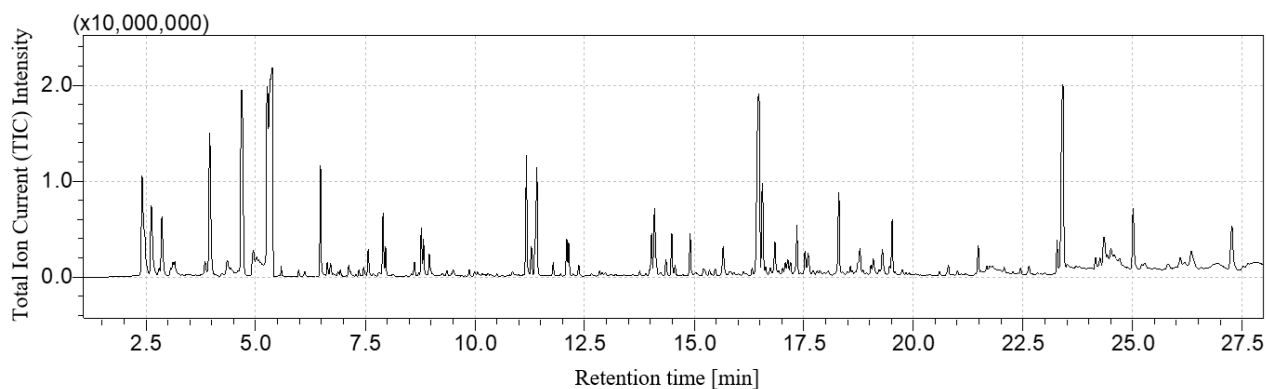

**Figure S8.** PP+PS chromatogram.

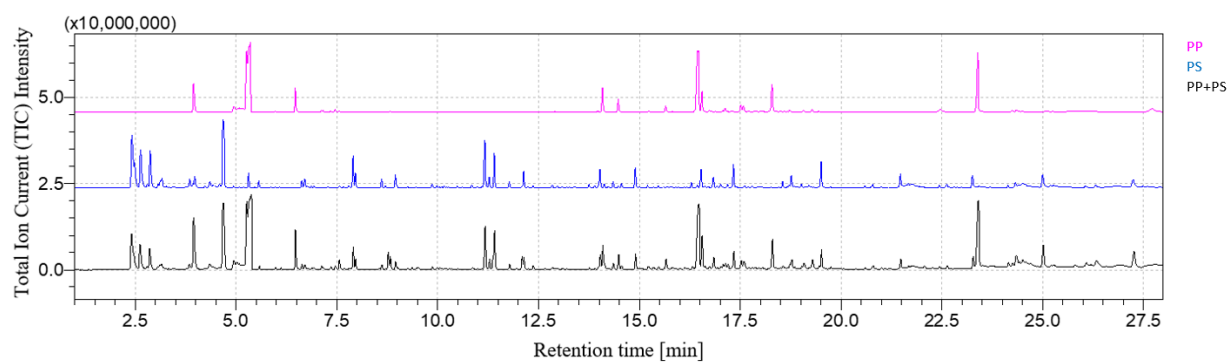

**Figure S9.** PP+PS chromatogram comparison.

Figure S10 and Figure S11 show PS+PA chromatogram and its comparison with PA and PS chromatograms.

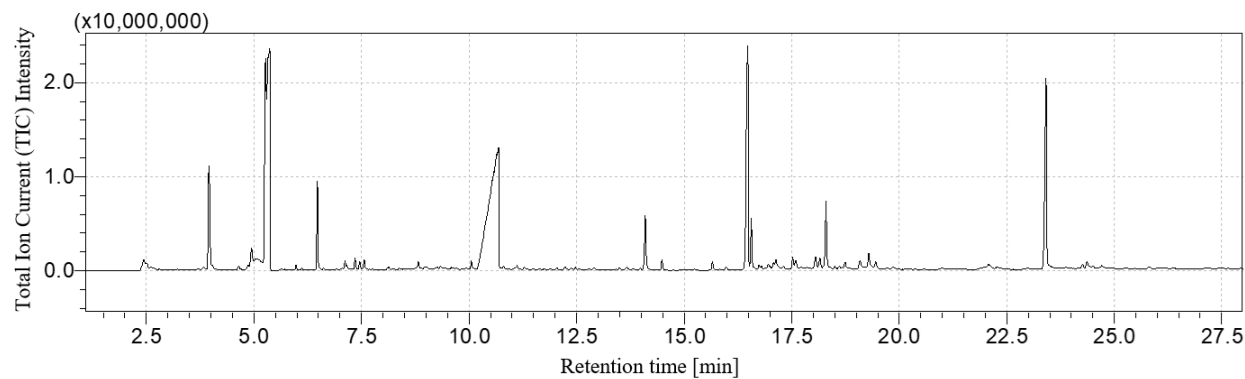

**Figure S10.** PS+PA chromatogram.

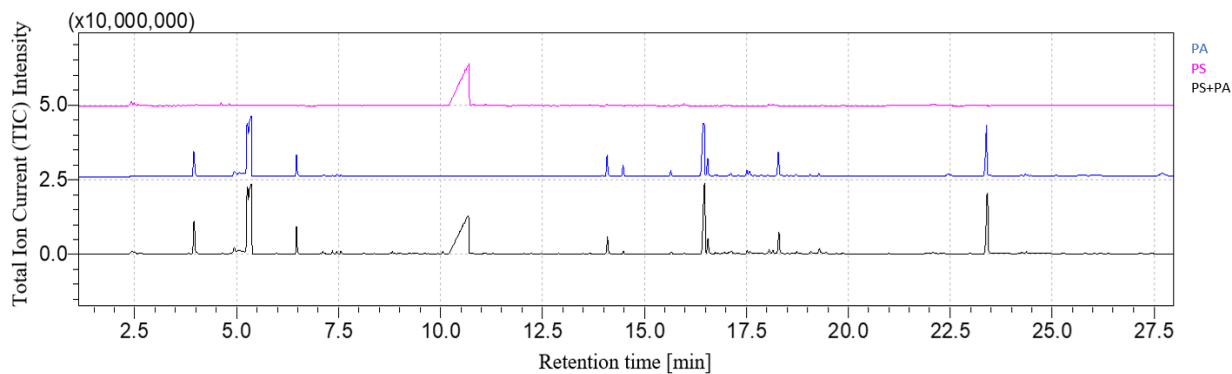

**Figure S11.** PS+PA chromatogram comparison.

Figure S12 and

Figure S13 show LDPE+PP+PS chromatogram and its comparison with LDPE, PP and PS chromatograms.

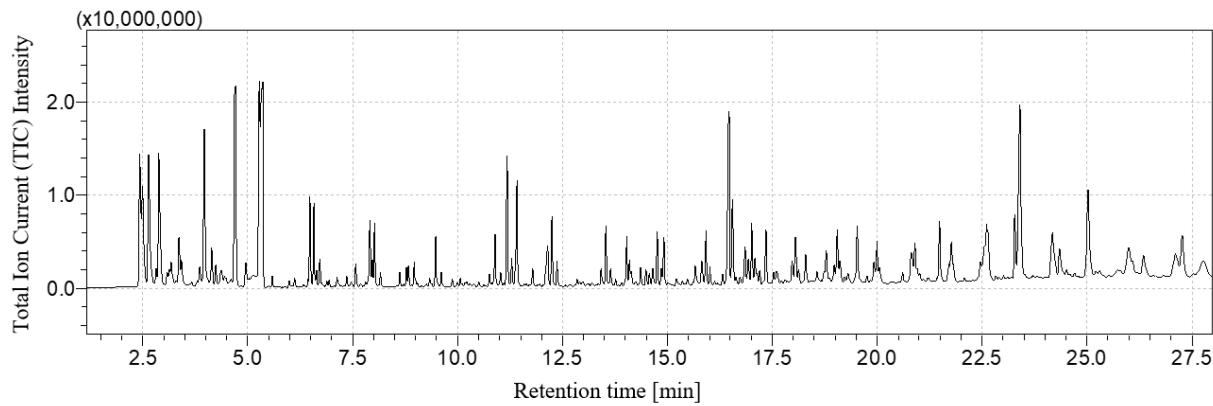

**Figure S12.** LDPE+PP+PS chromatogram.

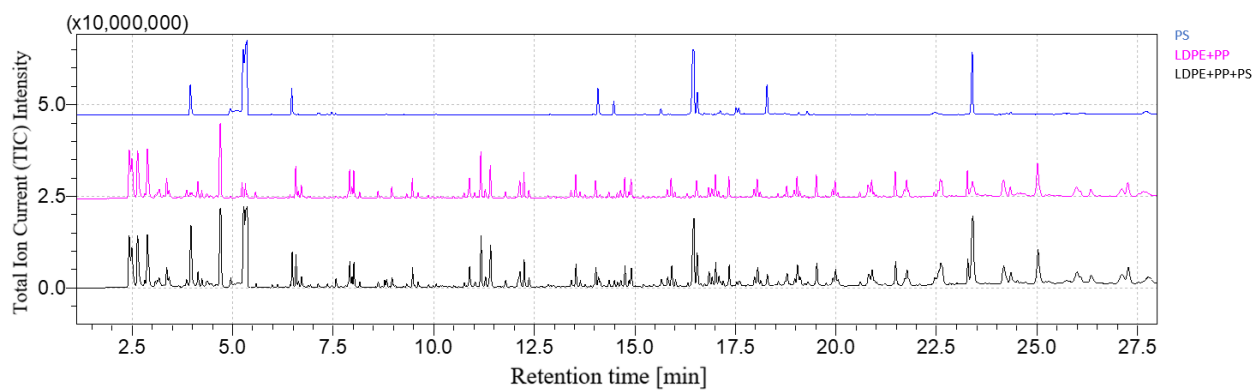

**Figure S13.** LDPE+PP+PS chromatogram comparison.

Figure S14 and Figure S15 show PP+PS+PC chromatogram and its comparison with PP, PS and PC chromatograms.

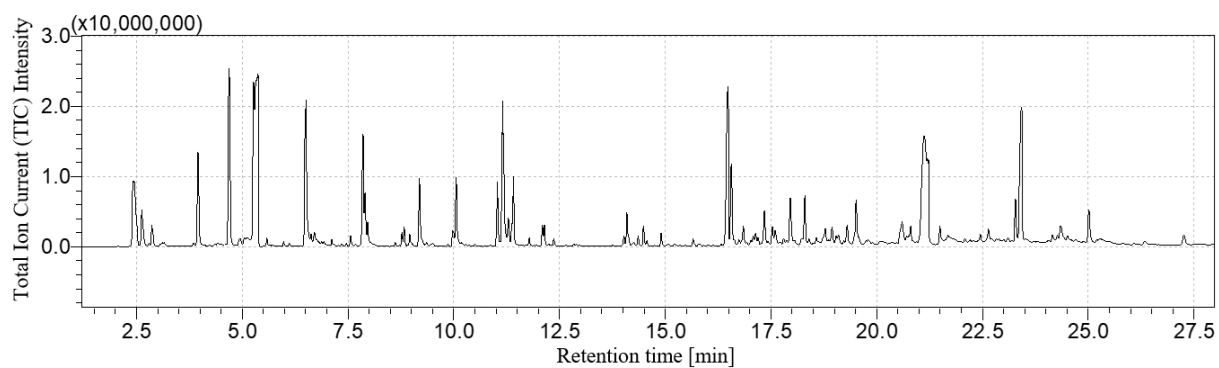

**Figure S14.** PP+PS+PC chromatogram.

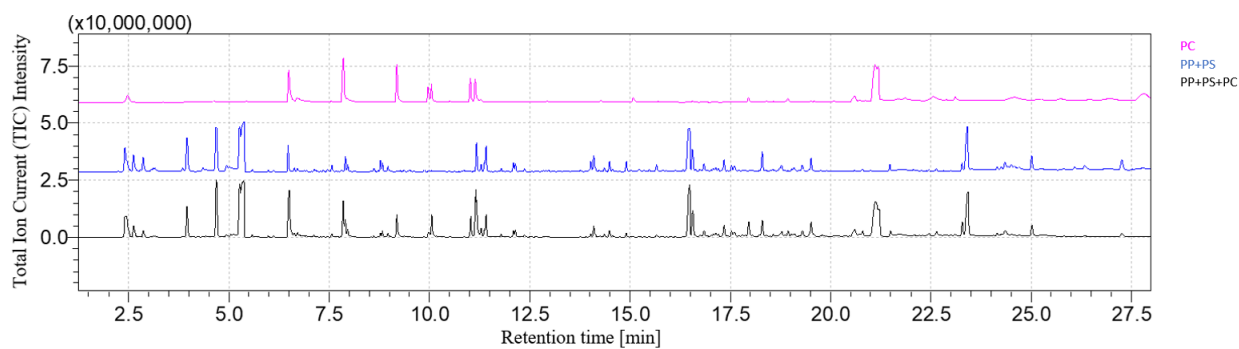

**Figure S15.** PP+PS+PC chromatogram comparison.

Figure S16 and

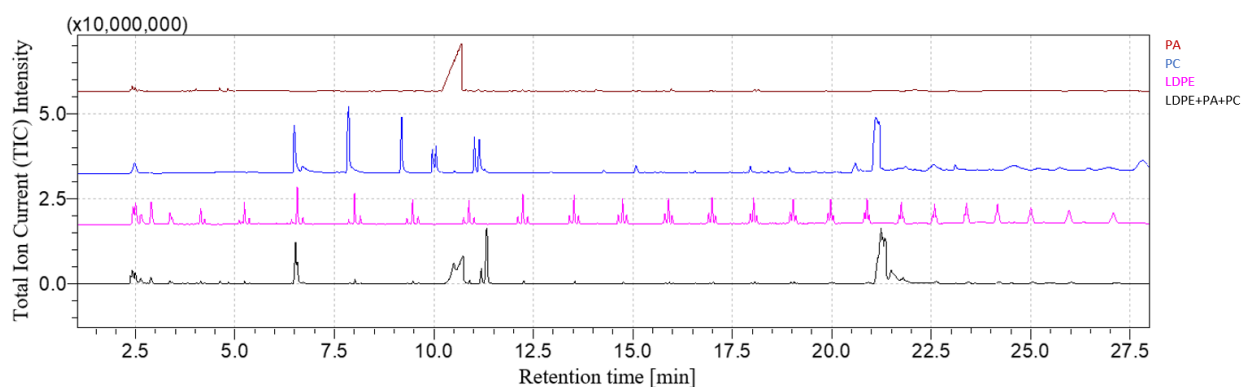

Figure S17 show LDPE+PA+PC chromatogram and its comparison with LDPE, PA and PC chromatograms.

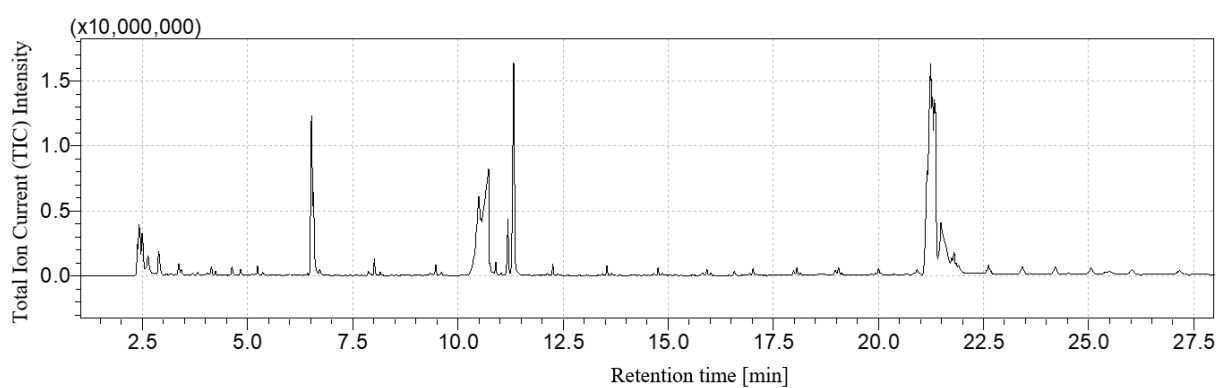

**Figure S16.** LDPE+PA+PC chromatogram.

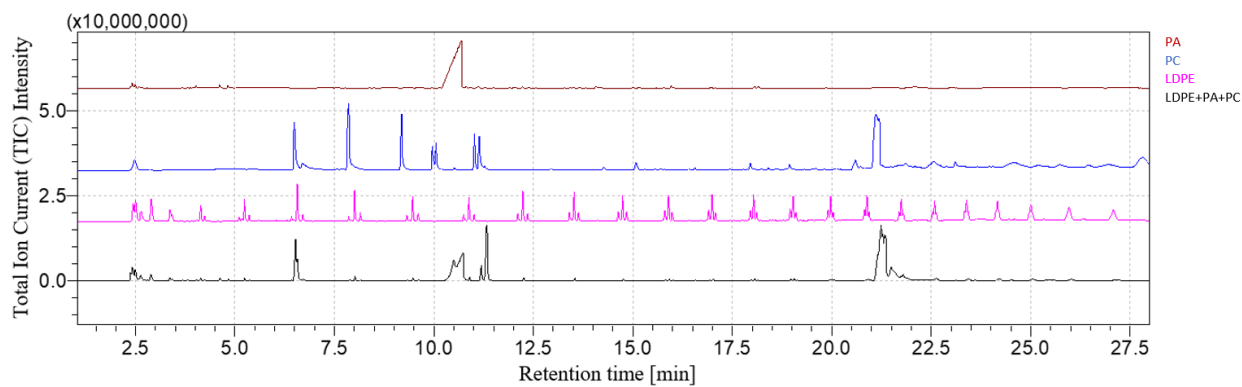

**Figure S17.** LDPE+PA+PC chromatogram comparison.

Figure S18 and Figure S19 show LDPE+PS+PA chromatogram and its comparison with LDPE, PS and PA chromatograms.

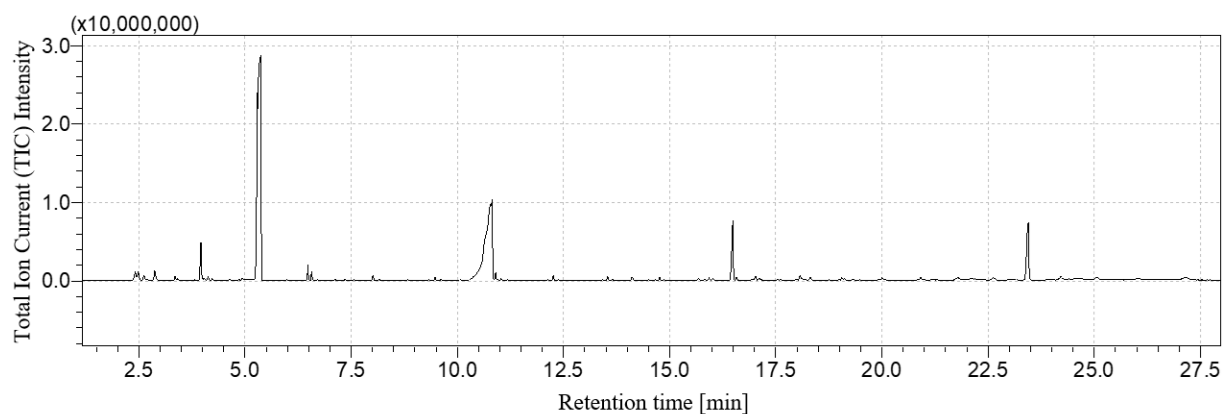

**Figure S18.** LDPE+PS+PA chromatogram.

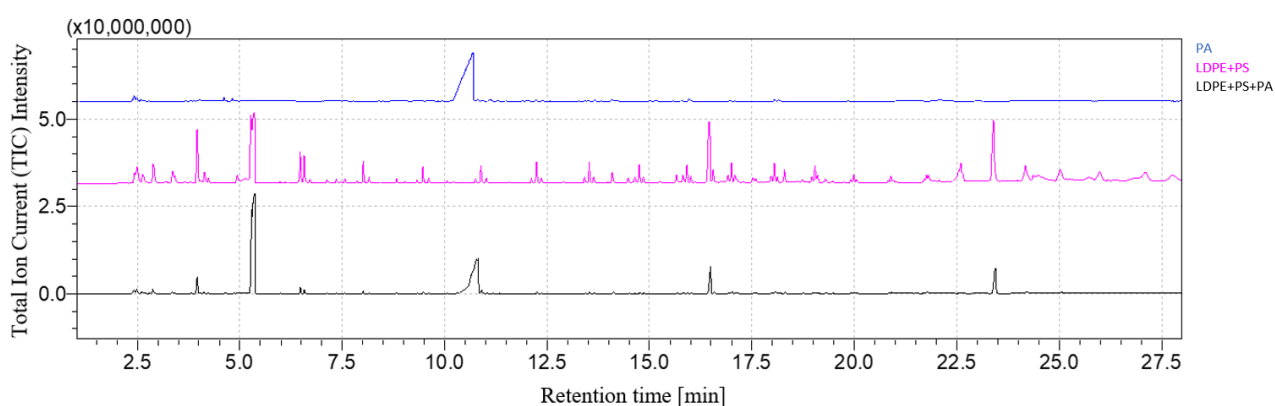

**Figure S19.** LDPE+PS+PA chromatogram comparison.

Figure S20 and Figure S21 show LDPE+PS+PC chromatogram and its comparison with LDPE, PS and PC chromatograms.

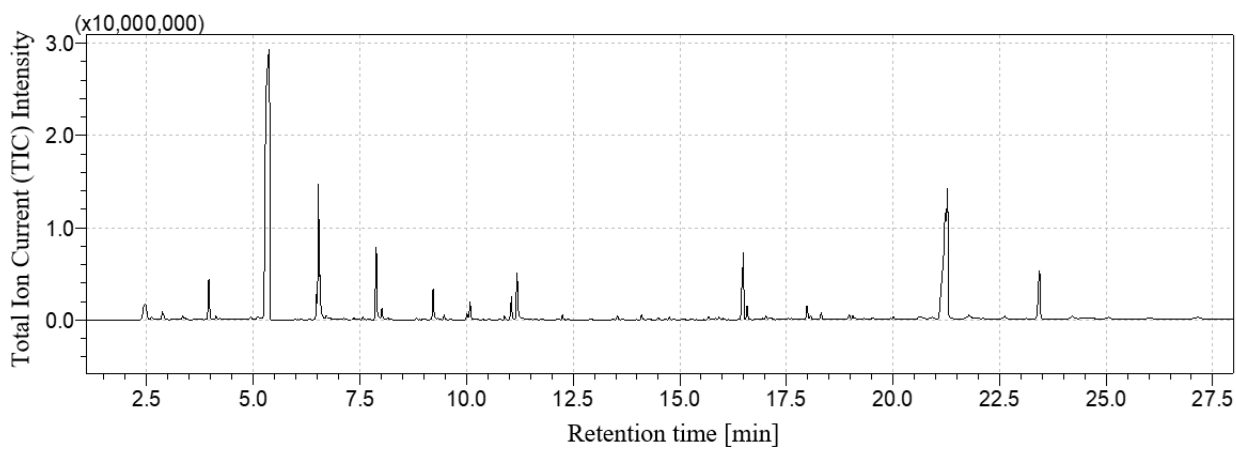

**Figure S20.** LDPE+PS+PC chromatogram.

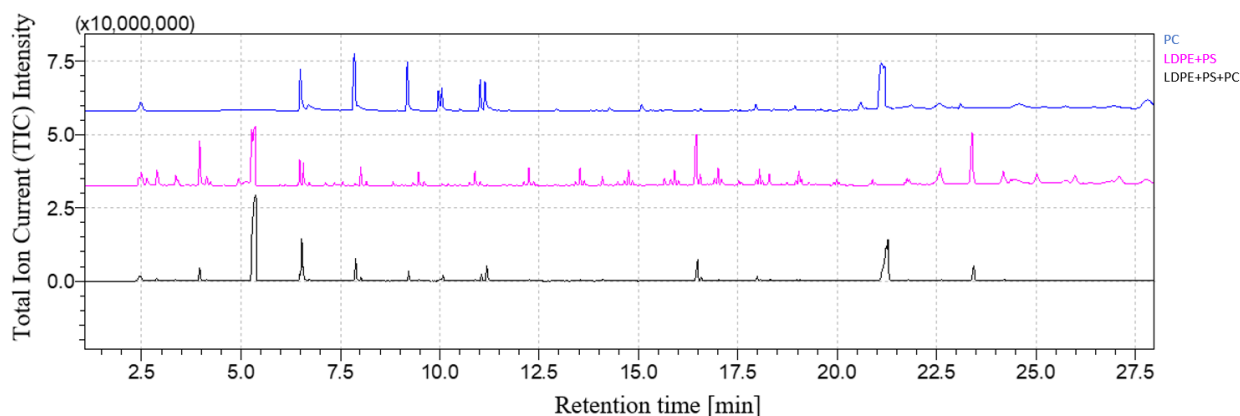

**Figure S21.** LDPE+PS+PC chromatogram comparison.

Figure S22 and Figure S23 show LDPE+PP+PS+PA chromatogram and its comparison with LDPE+PP and PS+PA chromatograms.

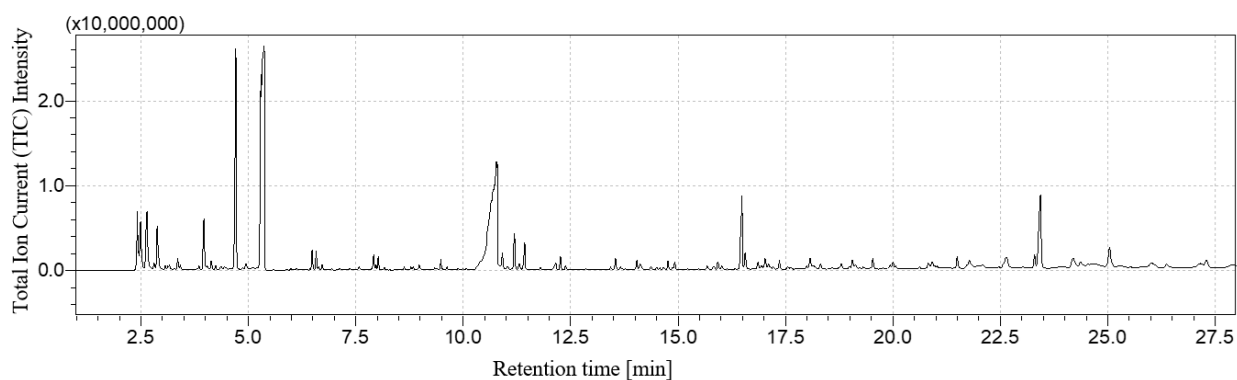

**Figure S22.** LDPE+PP+PS+PA chromatogram.

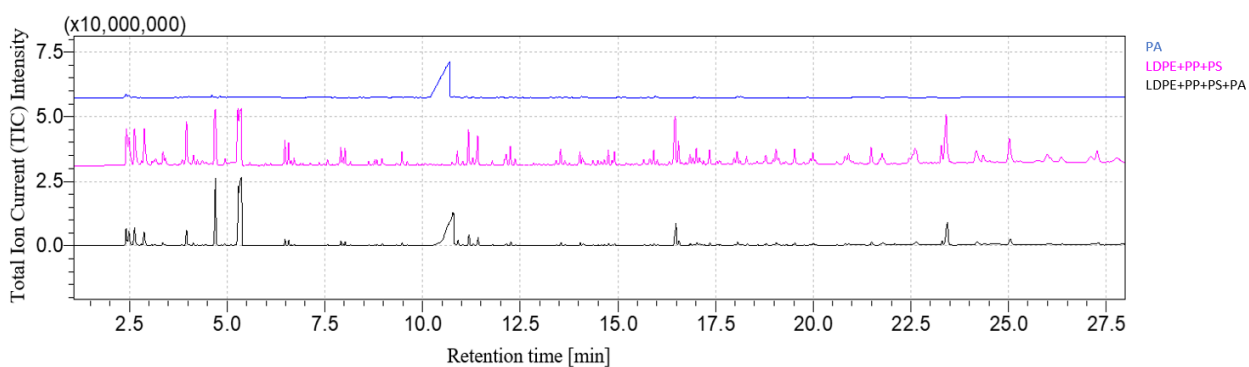

**Figure S23.** LDPE+PP+PS+PA chromatogram comparison.

Figure S24 and Figure S25 show LDPE+PP+PA+PC chromatogram and its comparison with LDPE+PA+PC and PP chromatograms.



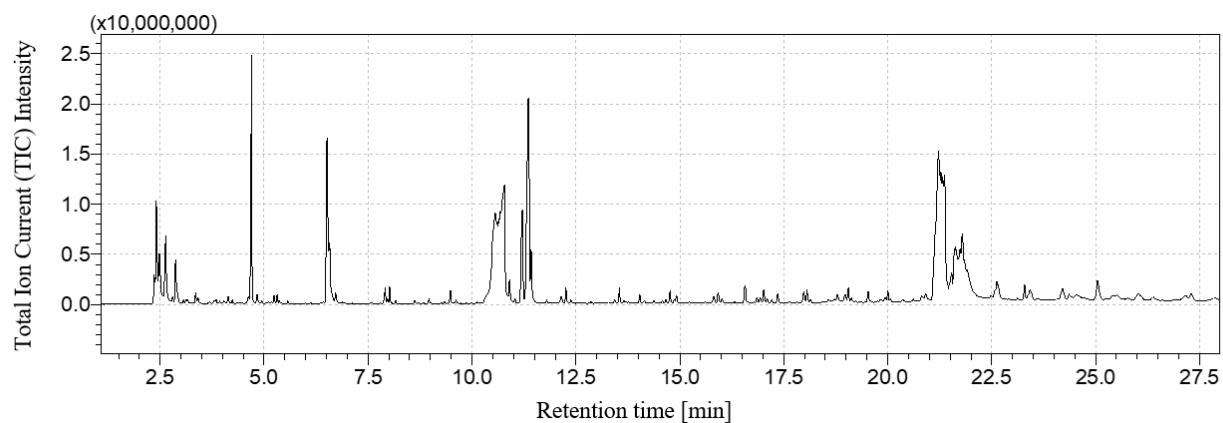

**Figure S24.** LDPE+PP+PA+PC chromatogram.

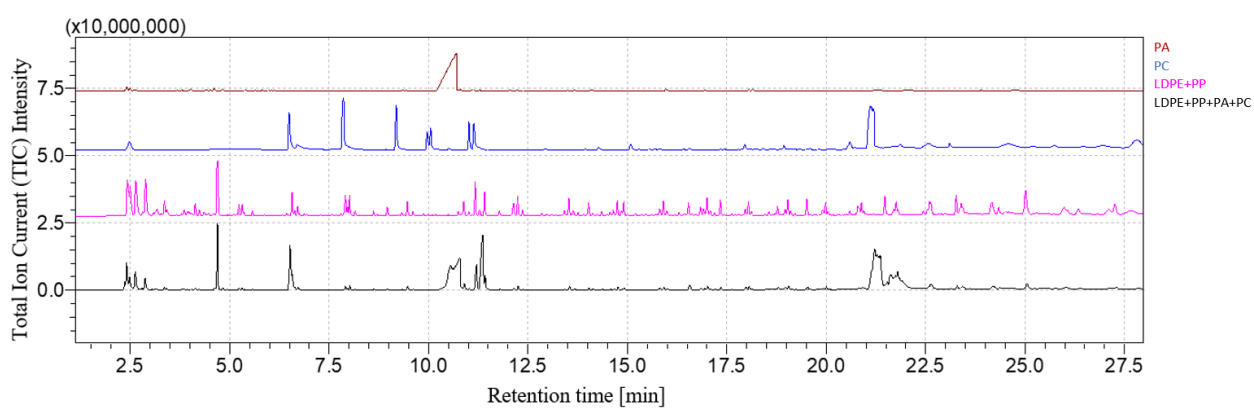

**Figure S25.** LDPE+PP+PA+PC chromatogram comparison.

Figure S26 and

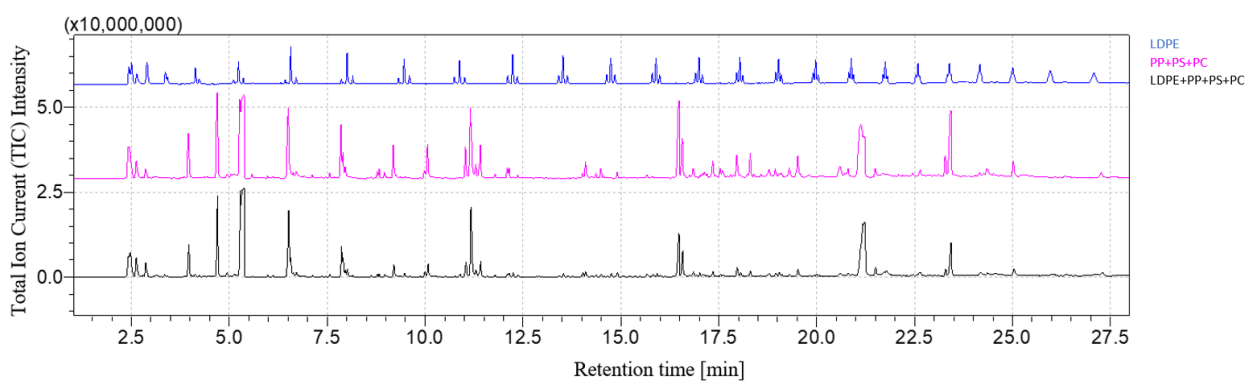

Figure **S27** show LDPE+PP+PS+PC chromatogram and its comparison with PP+PS+PC and LDPE chromatograms.

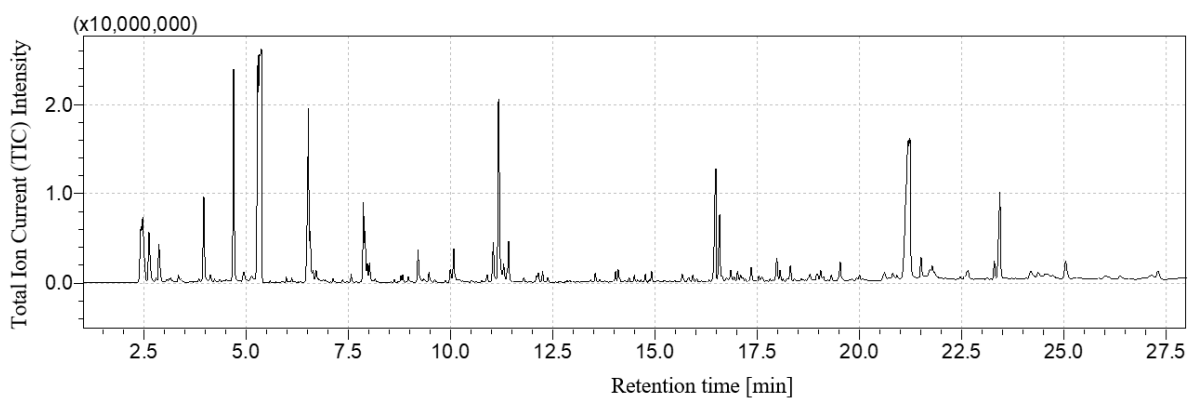

**Figure S26.** LDPE+PP+PS+PC chromatogram.

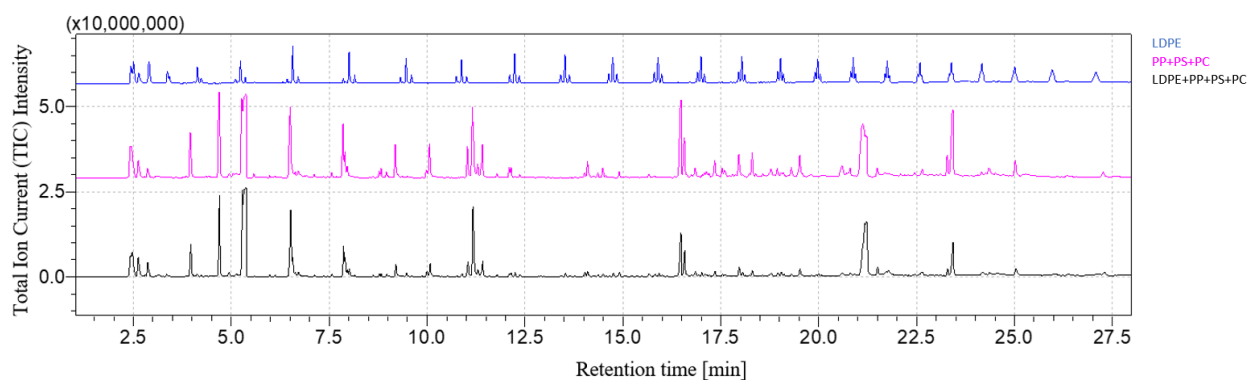

**Figure S27.** LDPE+PP+PS+PC chromatogram comparison.

Figure S28 and Figure S29 show LDPE+PS+PA+PC chromatogram and its comparison with LDPE+PS+PC and PA chromatograms.

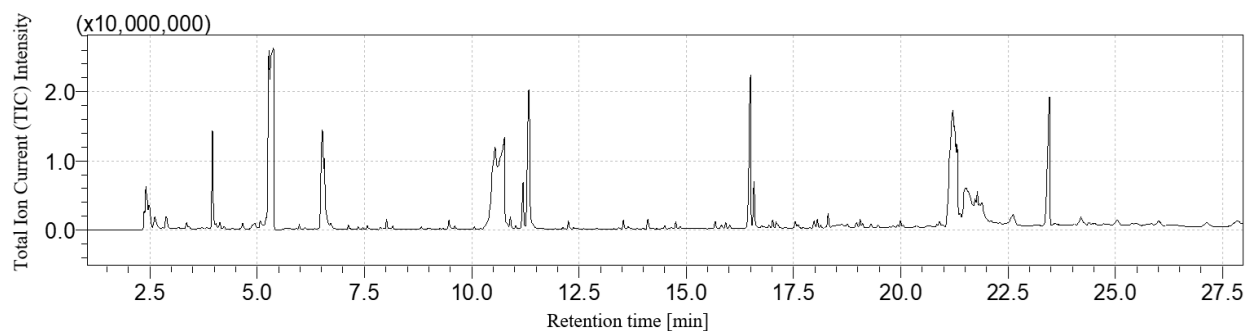

**Figure S28.** LDPE+PS+PA+PC chromatogram.

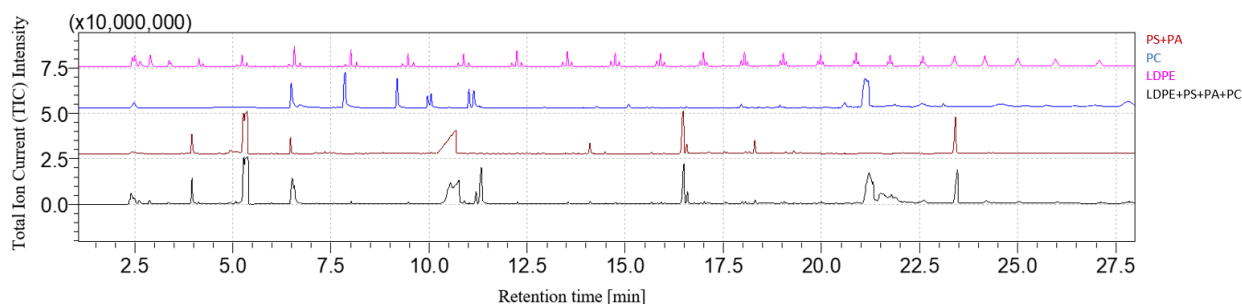

**Figure S29.** LDPE+PS+PA+PC chromatogram comparison.

Table S1, Table S2 and Table S3 report the values of peaks areas of the characteristic markers of HDPE, PP and PS in different types of blends.

| HDPE [%wt] | HDPE [mg] | PP [%wt] | PP [mg] | 1-decene area [TIC] | 1-dodecene area [TIC] | 2,4-dimethyl-1-heptene [TIC] | 1-undecene, 7-methyl [TIC] |
|------------|-----------|----------|---------|---------------------|-----------------------|------------------------------|----------------------------|
| 10         | 0.06      | 90       | 0.54    | 2.75E6              | 1.34E6                | 8.05E7                       | 2.44E7                     |
| 30         | 0.18      | 70       | 0.42    | 6.16E6              | 3.34E6                | 7.96E7                       | 1.78E7                     |
| 50         | 0.30      | 50       | 0.30    | 8.83E6              | 4.47E6                | 4.90E7                       | 6.63E6                     |
| 70         | 0.42      | 30       | 0.18    | 1.67E7              | 9.03E6                | 4.50E7                       | 5.43E6                     |
| 90         | 0.54      | 10       | 0.06    | 2.11E7              | 1.17E7                | 2.53E7                       | 3.87E6                     |
| 100        | 0.6       | 0        | 0       | 3.18E7              | 1.84E7                | 0                            | 0                          |
| 0          | 0         | 100      | 0.6     | 0                   | 0                     | 8.16E7                       | 8.16E7                     |

**Table S1.** Peaks areas of HDPE and PP in HDPE-PP blends.

| HDPE [%wt] | HDPE [mg] | PS [%wt] | PS [mg] | 1-decene area [TIC] | 1-dodecene area [TIC] | Bibenzyl area [TIC] | 2,5-diphenyl-1,5-hexadiene [TIC] |
|------------|-----------|----------|---------|---------------------|-----------------------|---------------------|----------------------------------|
| 10         | 0.06      | 90       | 0.54    | 604693              | 377339                | 6.33E6              | 5.62E6                           |
| 50         | 0.30      | 50       | 0.30    | 8.38E6              | 4.49E6                | 2.24E6              | 4.61E6                           |
| 90         | 0.54      | 10       | 0.06    | 1.87E7              | 1.07E7                | 309195              | 568575                           |
| 100        | 0.6       | 0        | 0       | 3.18E7              | 1.84E7                | 0                   | 0                                |
| 0          | 0         | 100      | 0.6     | 0                   | 0                     | 8.58E6              | 5.40E6                           |

**Table S2.** Peaks areas of HDPE and PS in HDPE-PS blends.

| PP [%wt] | PP [mg] | PS [%wt] | PS [mg] | 2,4-dimethyl-1-heptene area [TIC] | 1-undecene, 7-methyl [TIC] | Bibenzyl area [TIC] | 2,5-diphenyl-1,5-hexadiene [TIC] |
|----------|---------|----------|---------|-----------------------------------|----------------------------|---------------------|----------------------------------|
| 100      | 0.6     | 0        | 0       | 8.16E7                            | 2.55E7                     | 0                   | 0                                |
| 90       | 0.54    | 10       | 0.06    | 9.08E7                            | 2.41E7                     | -                   | 363284                           |
| 50       | 0.3     | 50       | 0.3     | 3.32E7                            | 6.79E6                     | 2.18E6              | 2.10E6                           |
| 10       | 0.06    | 90       | 0.54    | 2.30E6                            | 1.02E6                     | 6.94E6              | 5.08E6                           |
| 0        | 0       | 100      | 0.6     | 0                                 | 0                          | 8.58E6              | 5.40E6                           |

**Table S3.** Peaks areas of PP and PS in PP-PS blends.
